# Supplementary material for: p38- and MK2-dependent signalling promotes stress-induced centriolar satellite remodelling via 14-3-3-dependent sequestration of CEP131/AZI1
Source: PubMed Central journal article supplement (PMC4674683; doi:10.1038/ncomms10075), 2015-11-30
Supplement: ncomms10075-s1.pdf [file ncomms10075-s1.pdf]

Tollenaere et. al. Supplementary Figure 1

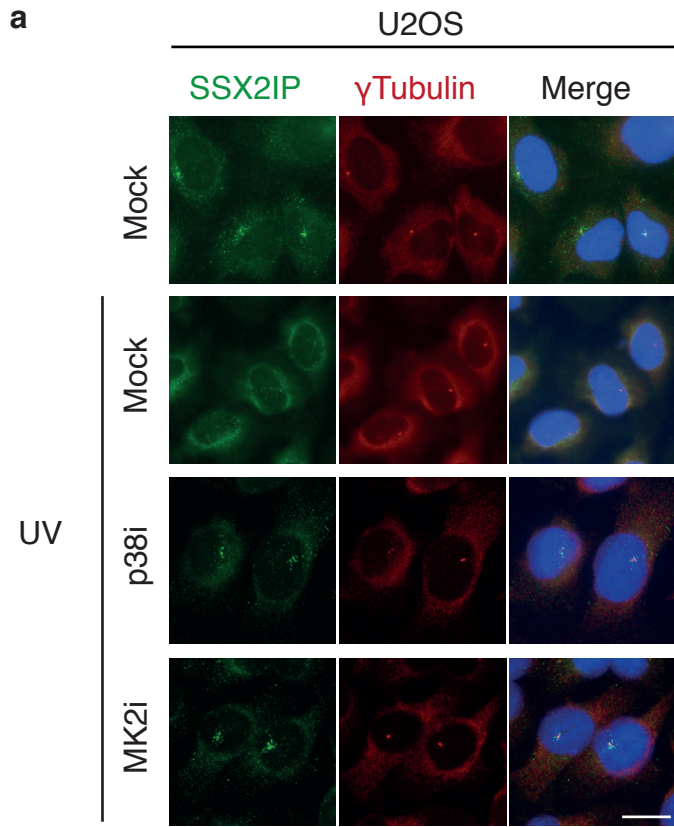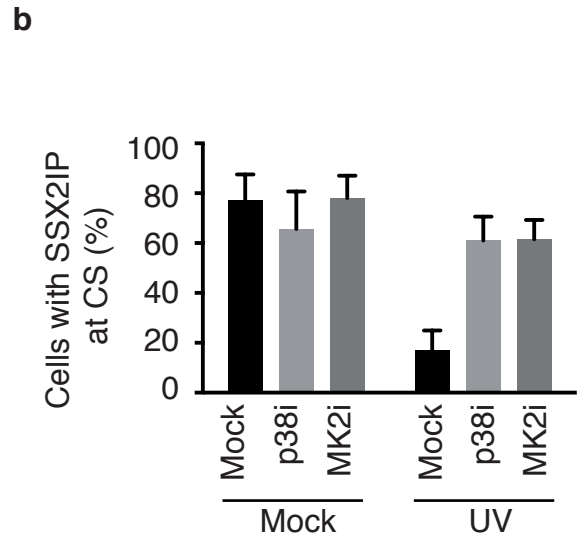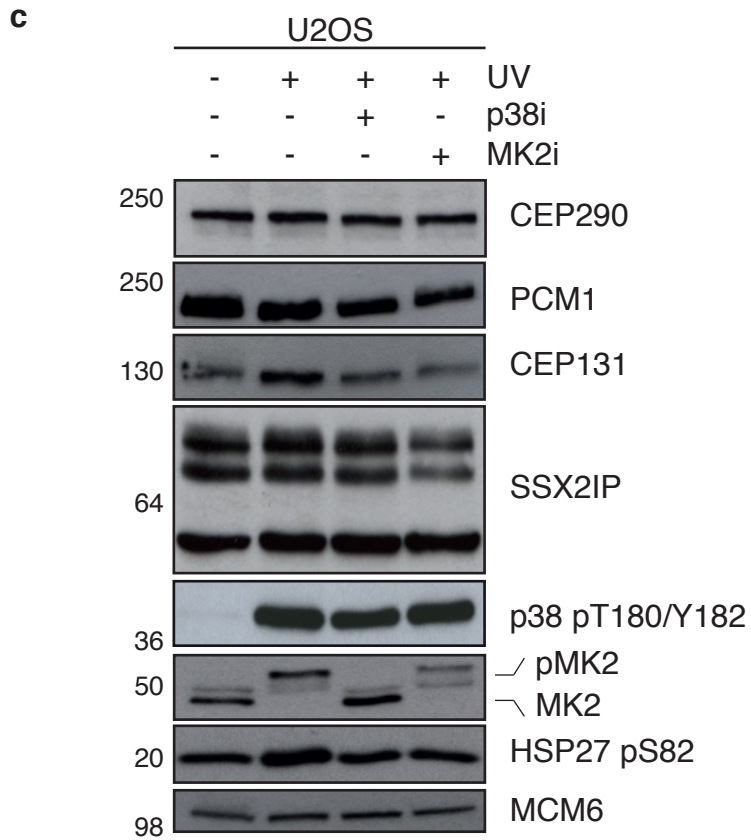

## Supplementary Figure 1

### Centriolar satellite dissolution after UV-irradiation in U2OS cells.

- a. U2OS cells were incubated with inhibitors against p38 (p38i) or MK2 (MK2i) for 1 h and exposed to UV-irradiation as indicated. Cells were fixed 1 h later and co-immunostained with SSX2IP and  $\gamma$ -tubulin antibodies. Scale bar, 10  $\mu\text{m}$ .
- b. Quantification of SSX2IP localization to CS in cells treated as in (a). At least 100 cells were scored per condition. Results (mean $\pm$ SD) from three independent experiments are shown. P-values were calculated from a one-tailed student's t-test.
- c. Lysates from cells in a) were analyzed by immunoblotting with the indicated antibodies.

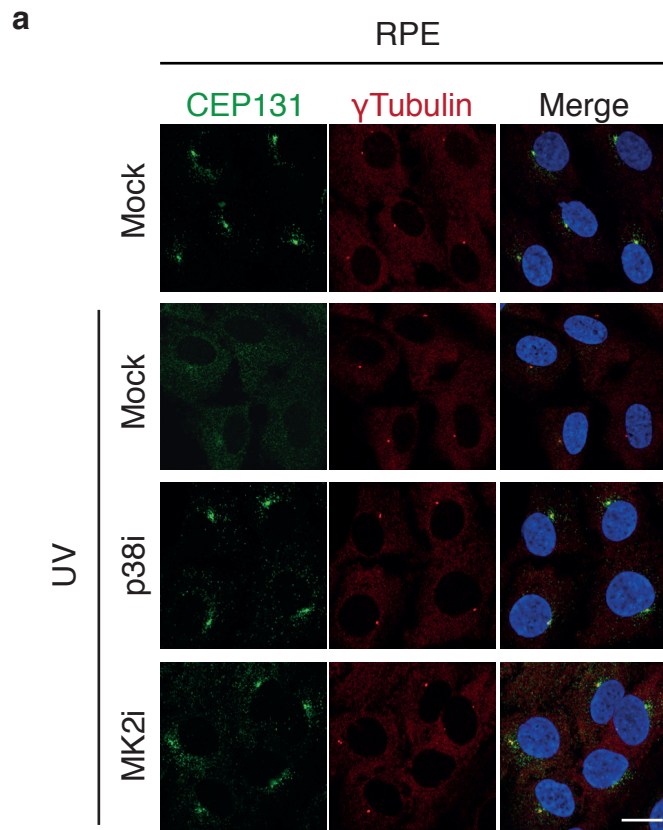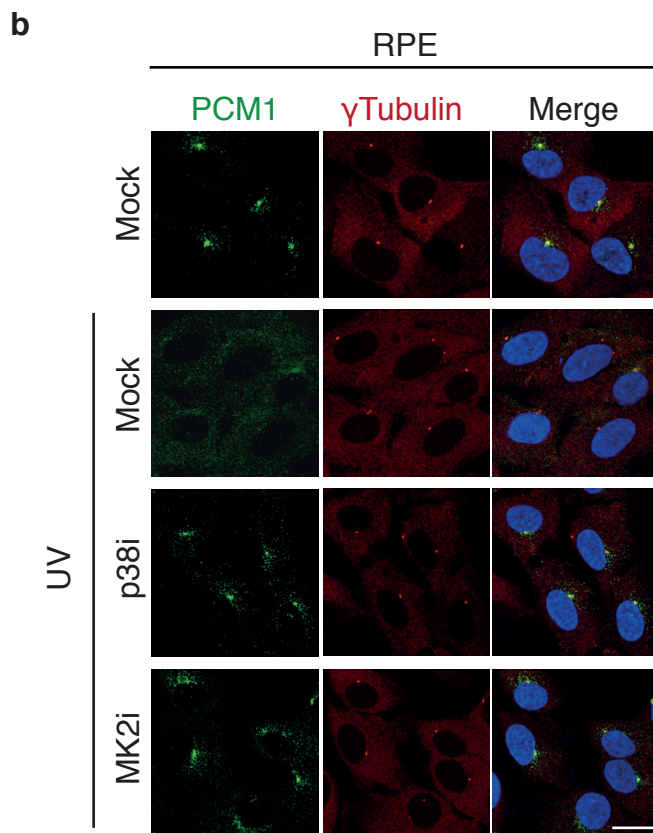

## **Supplementary Figure 2**

### **Centriolar satellite dissolution after UV-irradiation in RPE cells.**

- a.** Immortalized human retinal pigment epithelial cells (RPE) were treated with p38 or MK2 inhibitors for 1 hour and fixed an additional hour after UV-irradiation. Cells were analyzed by co-immunostaining with antibodies against CEP131 and  $\gamma$ -tubulin.
- b.** RPE cells were treated as in (a) and co-immunostained against PCM1 and  $\gamma$ -tubulin. All scale bars, 10  $\mu\text{m}$ .

Tollenaere et. al. Supplementary Figure 3

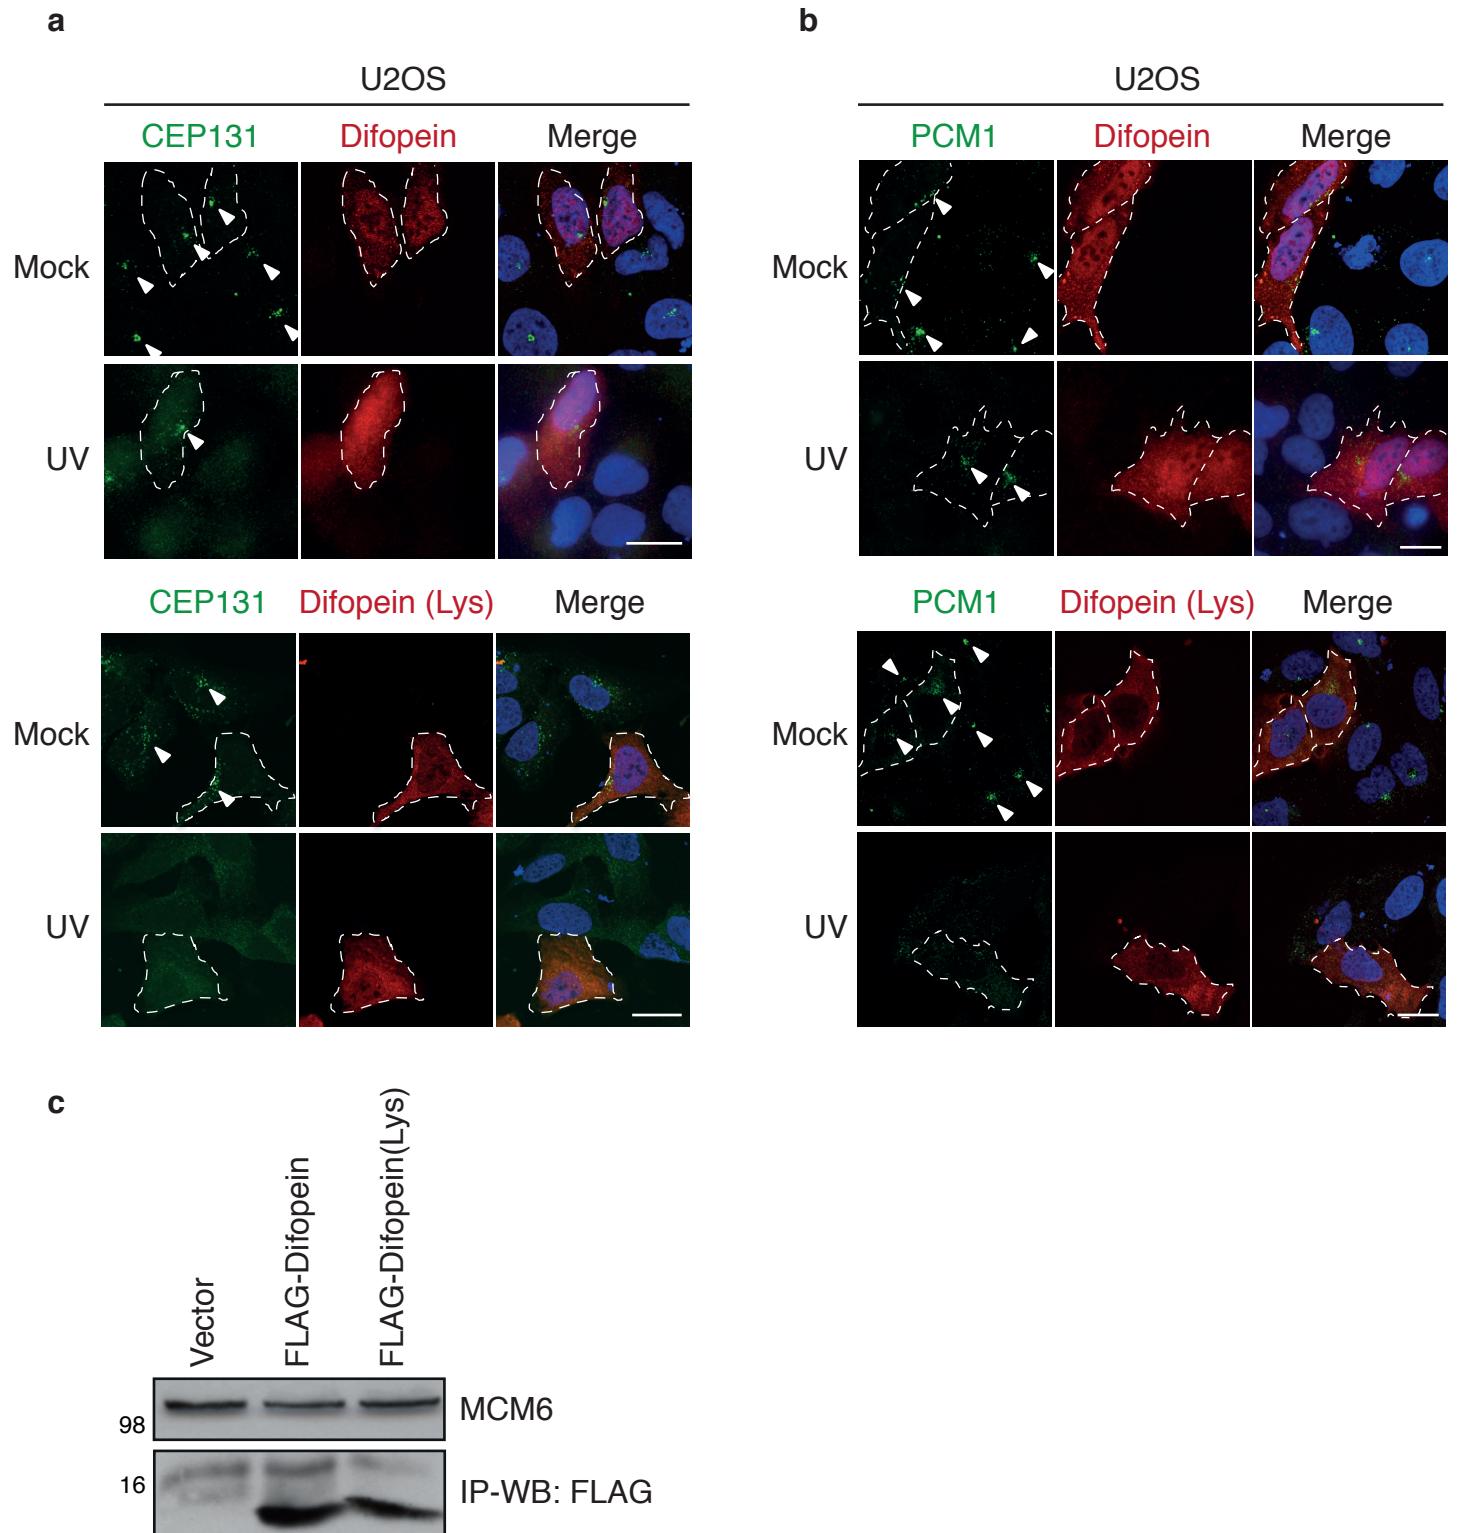

### **Supplementary Figure 3**

#### **Difopein prevents stress-induced centriolar satellite collapse.**

- a.** U2OS cells were transiently transfected with FLAG-Difopein or FLAG-Difopein (Lys) and exposed to UV-irradiation as indicated. Cells were fixed 1 hour after UV and immunostained with antibodies against CEP131 and FLAG. Dotted white lines highlight FLAG-difopein expressing cells and white arrowheads mark CS.
- b.** Cells were transfected and treated as in (a), except that they were immunostained with antibodies against PCM1 and FLAG. Dotted white lines highlight FLAG-Difopein expressing cells and white arrowheads mark CS. All scale bars, 10  $\mu\text{m}$ .
- c.** U2OS cells were transfected with FLAG-Difopein or FLAG-Difopein (Lys) constructs. Input lysates and FLAG immunoprecipitates (IP) were analyzed by immunoblotting with the indicated antibodies.

Tollenaere et. al. Supplementary Figure 4

**a**

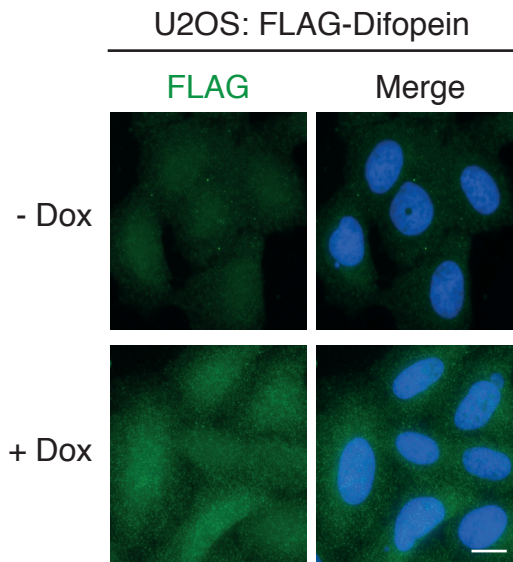

**b**

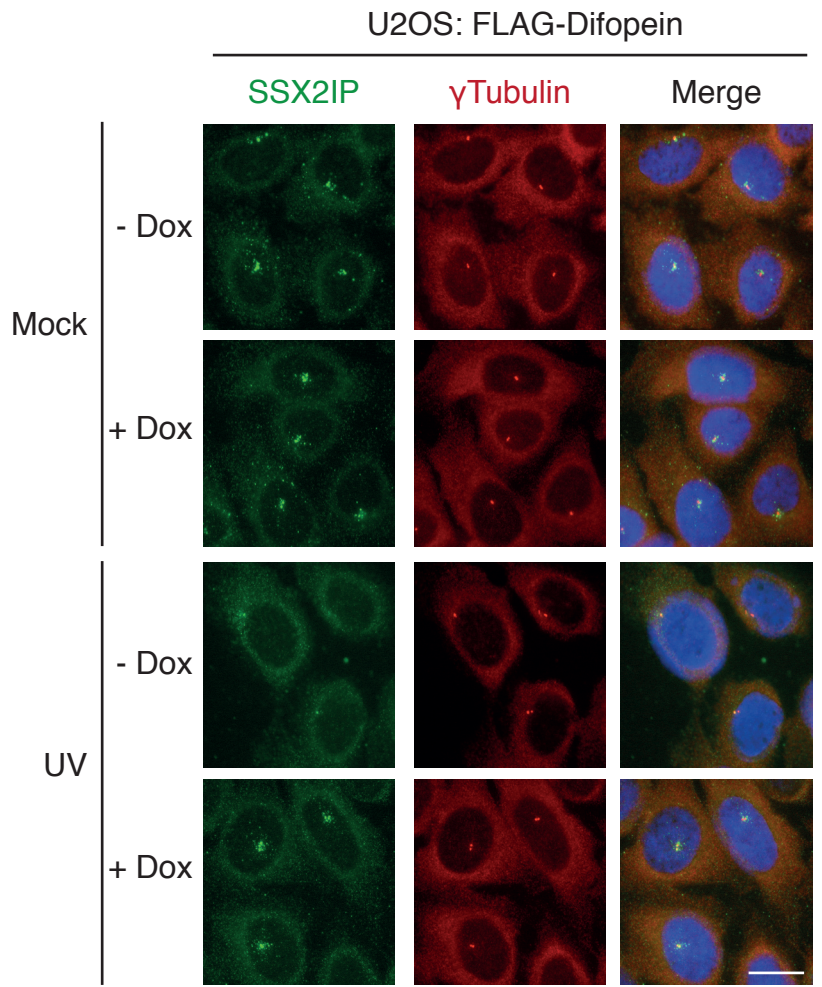

**c**

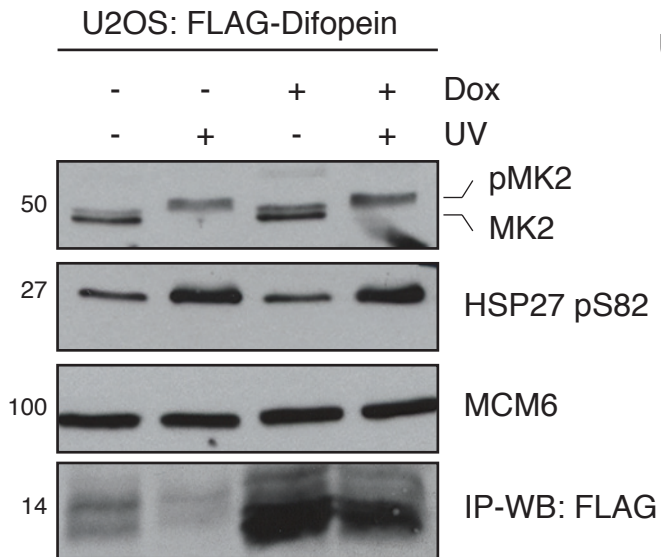

## Supplementary Figure 4

### Characterization of inducible U2OS: FLAG-Difopein cell line

- a. U2OS: FLAG-Difopein cells were induced with  $2 \mu\text{g ml}^{-1}$  doxycycline (Dox) for 24 hours, fixed and immunostained with antibodies against FLAG-tag.
- b. Cells were treated as in (a), fixed 1 h after UV and co-immunostained with antibodies against SSX2IP and  $\gamma$ -tubulin. Scale bars, 10  $\mu\text{m}$ .
- c. U2OS: FLAG-Difopein cells were treated as in (a) and (b) and assayed for p38 and MK2 activation by immunoblotting lysates with the indicated antibodies.



Tollenaere et. al. Supplementary Figure 5

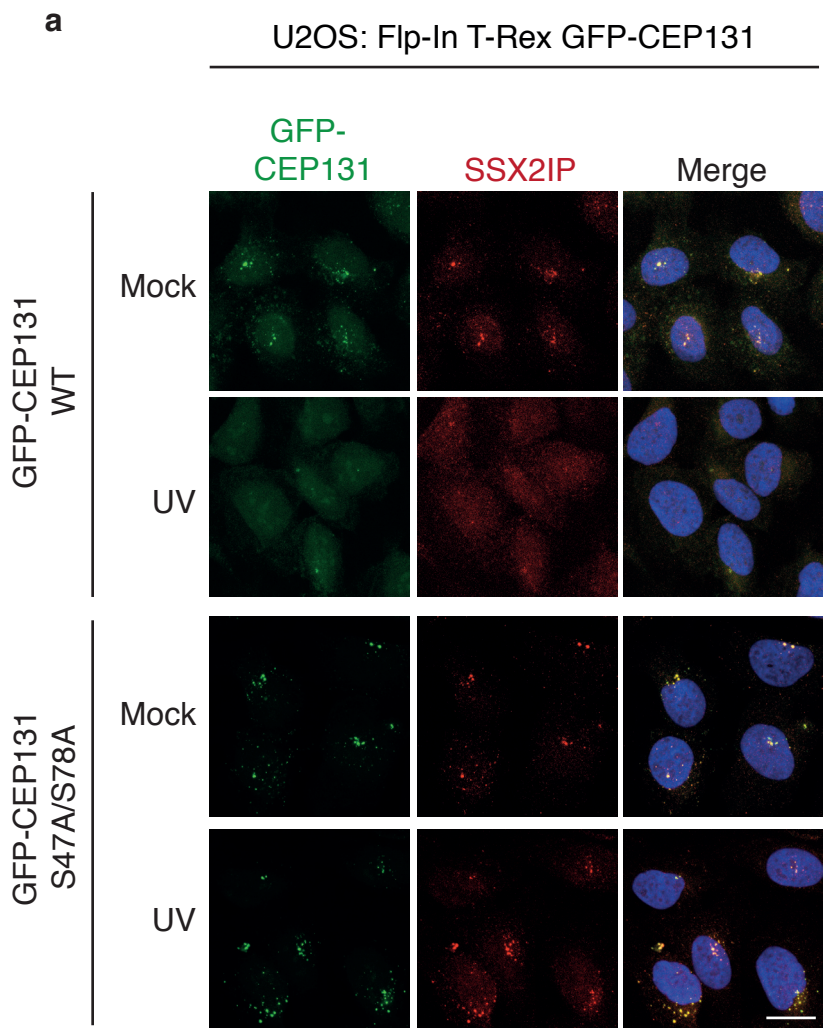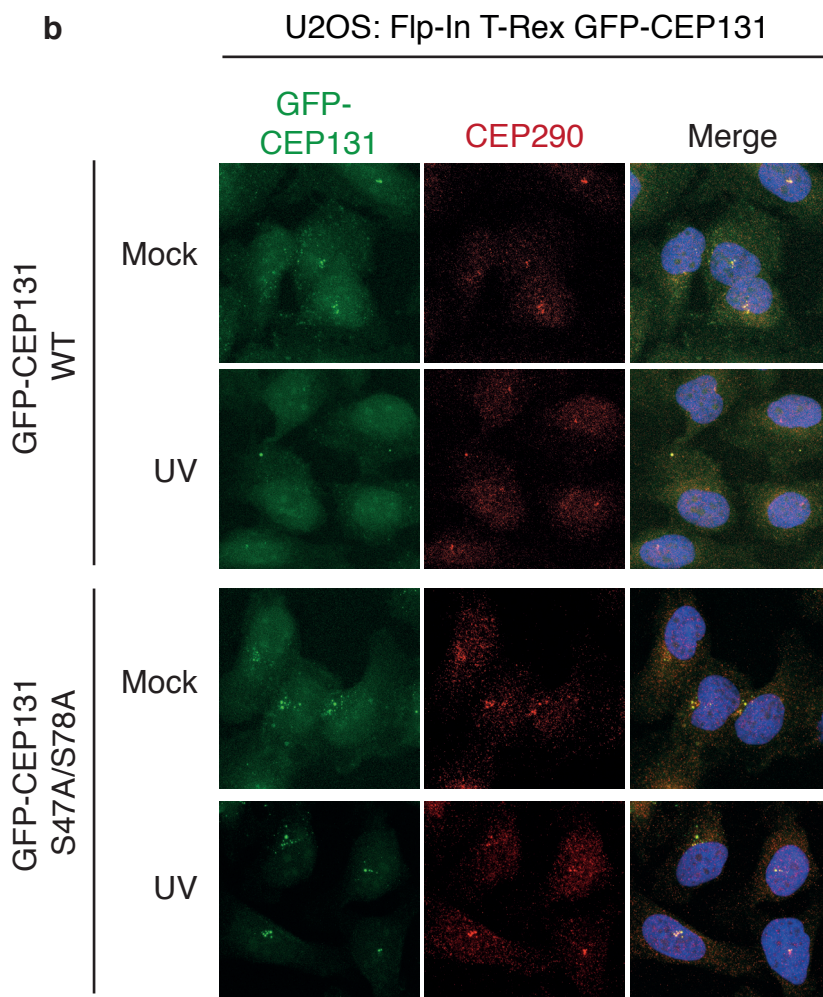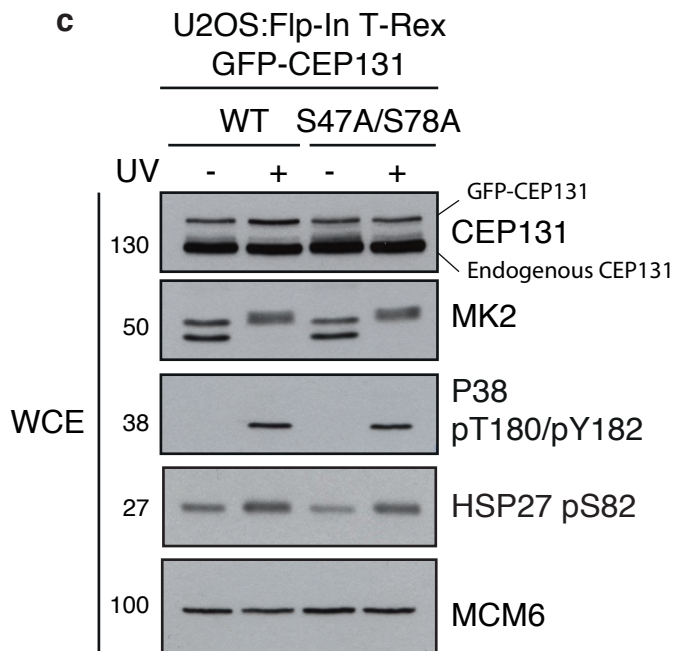

## **Supplementary Figure 5**

### **UV-induced displacement of SSX2IP and CEP290 from centriolar satellites requires CEP131 phosphorylation.**

- a.** U2OS: Flp-In T-Rex GFP-CEP131 WT and mutant (S47A/S78A) cells were exposed to UV-irradiation as indicated. Cells were fixed and immunostained with antibodies against SSX2IP.
- b.** As in (a), except that cells were immunostained with antibodies against CEP290. All scale bars, 10  $\mu\text{m}$ .
- c.** Cells were treated as in (a) and lysates were analyzed by immunoblotting with the indicated antibodies.

**a**

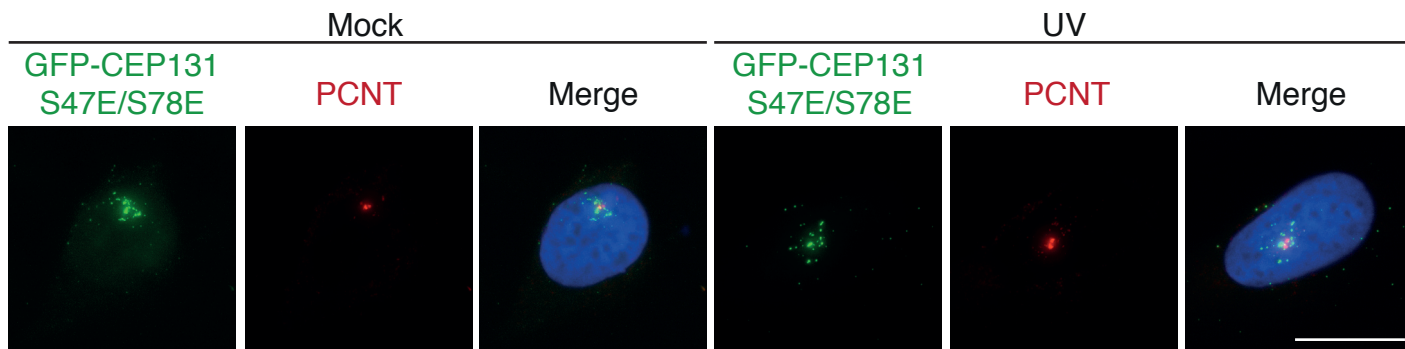

**b**

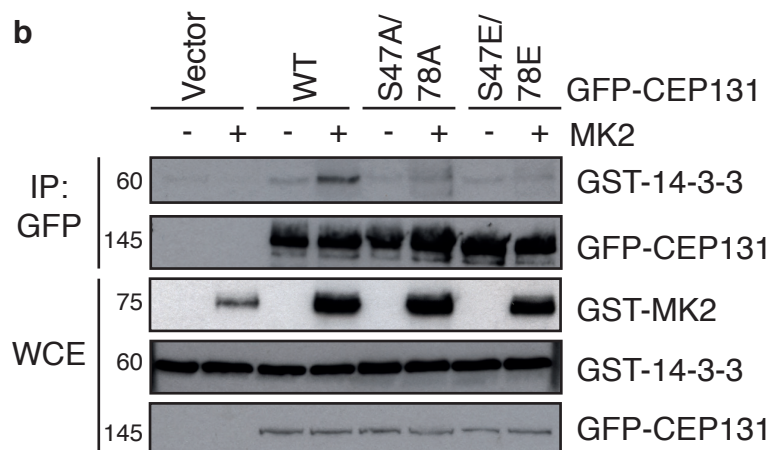

**c**

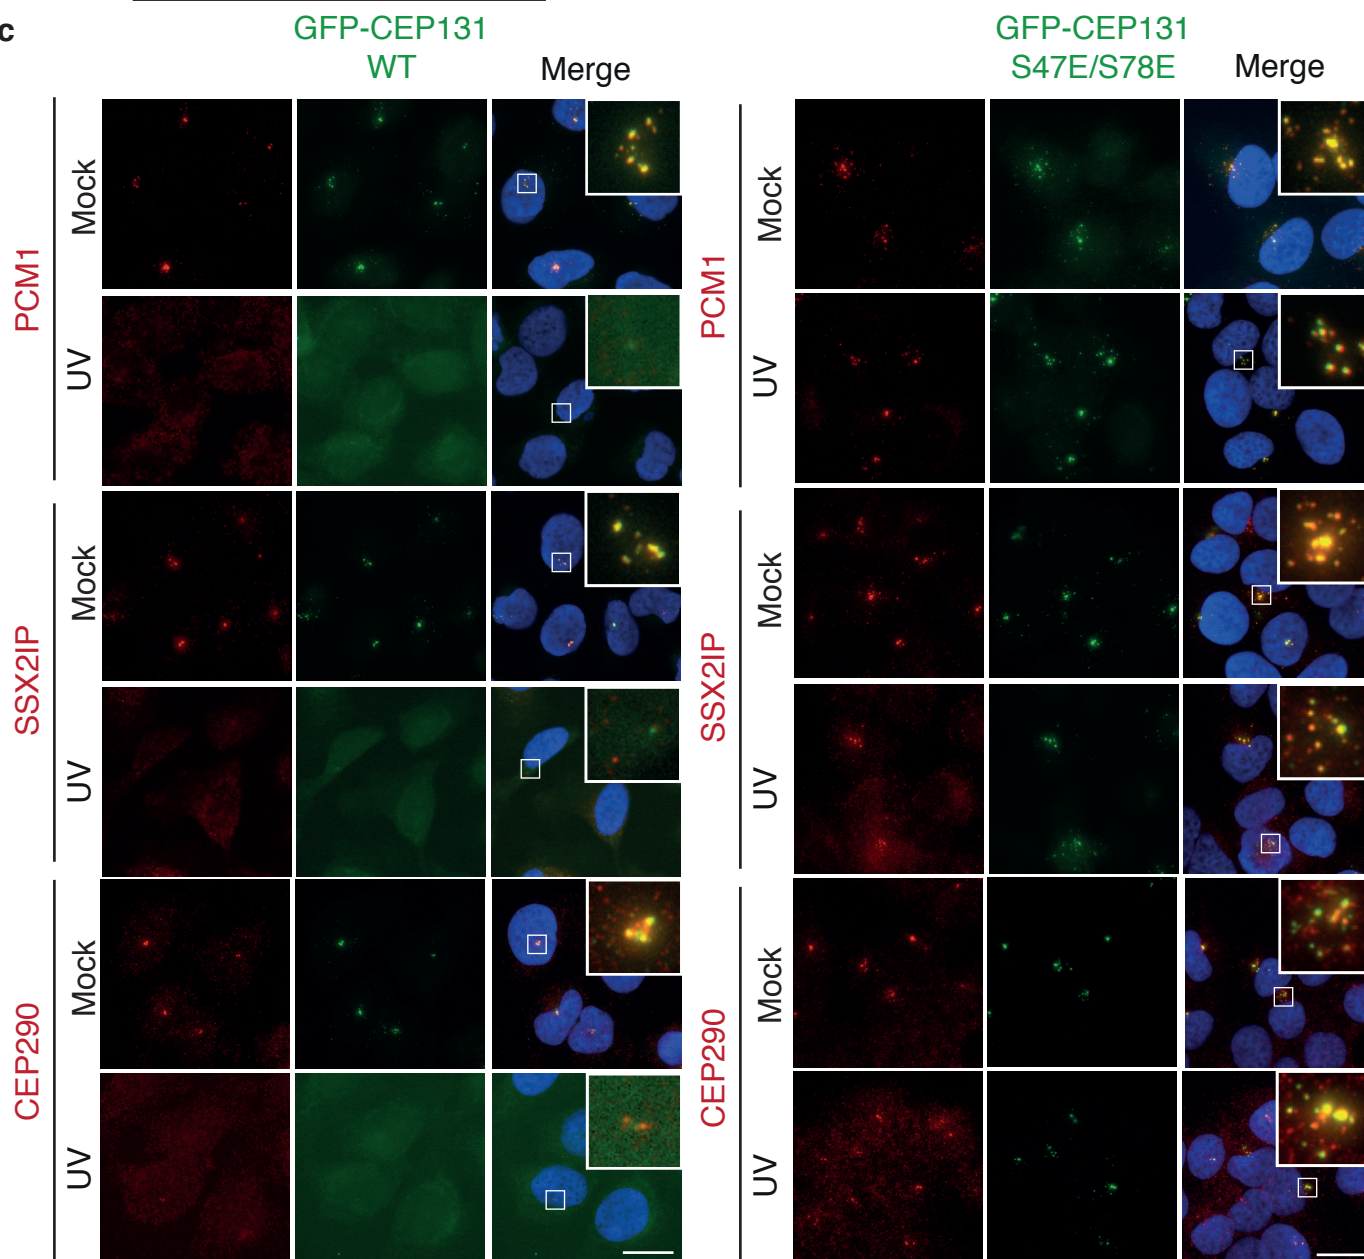

## Supplementary Figure 6

### “Phosphomimicking” CEP131 is refractory to 14-3-3 binding and CS remodeling.

- a. U2OS:FlpIn/T-Rex GFP-CEP131 S47E/S78E cells were treated with UV-irradiation, fixed and stained with antibodies against pericentrin.
  - b. Wild type (WT) and mutant versions of GFP-CEP131 were expressed in U2OS cells, isolated on GFP-Trap agarose and treated with lambda phosphatase prior to *in vitro* phosphorylation by recombinant GST-MK2. After washing, beads were incubated with GST-14-3-3 for 1 h and CEP131-14-3-3 binding was analyzed by immunoblotting with the indicated antibodies.
  - c. U2OS:FlpIn/T-Rex GFP-CEP131 WT and S47E/S78E cells were exposed to UV-irradiation, fixed and co-immunostained with the indicated antibodies.
- All scale bars, 10  $\mu$ m. Inserts show magnified regions of CS.

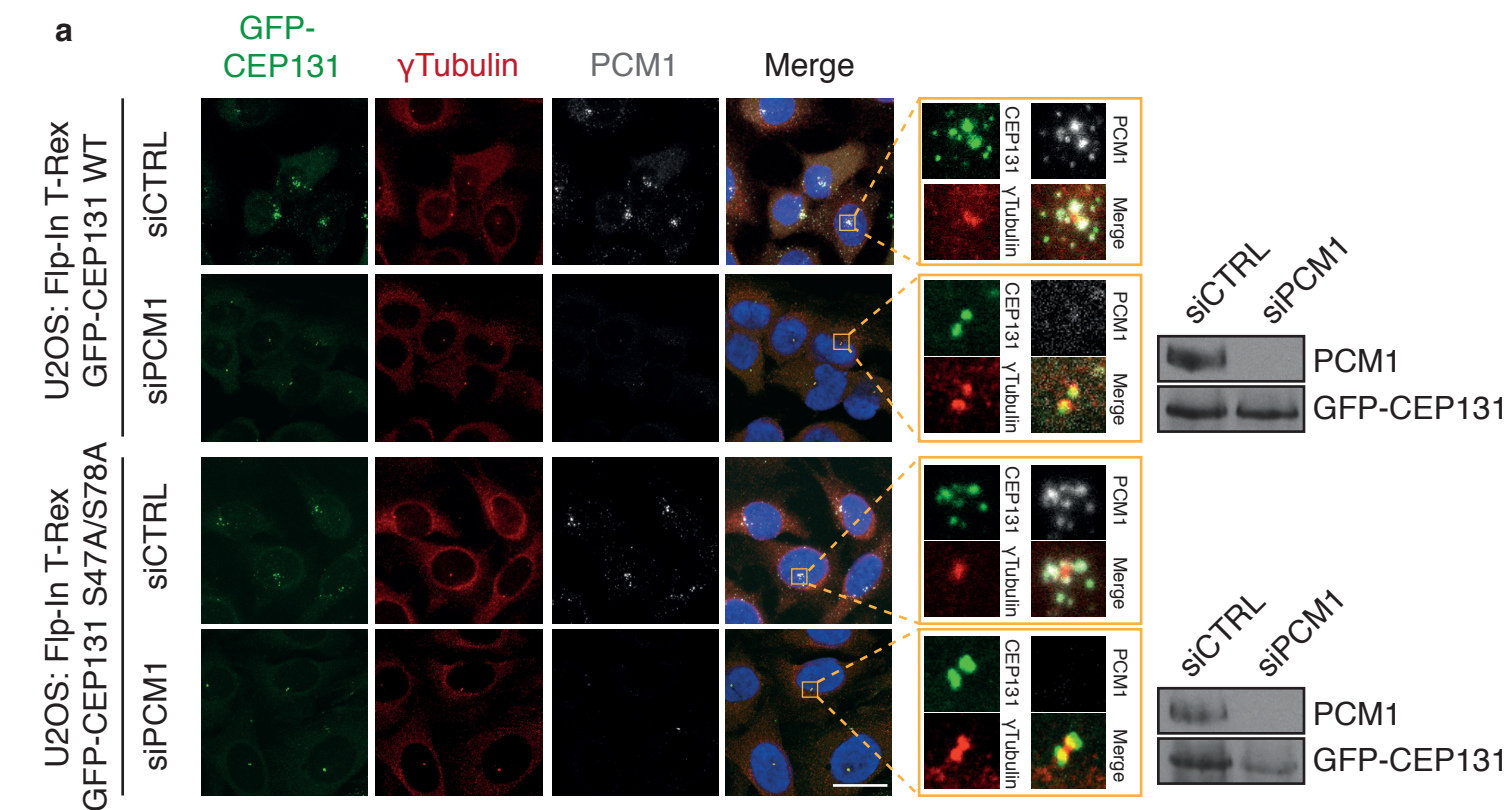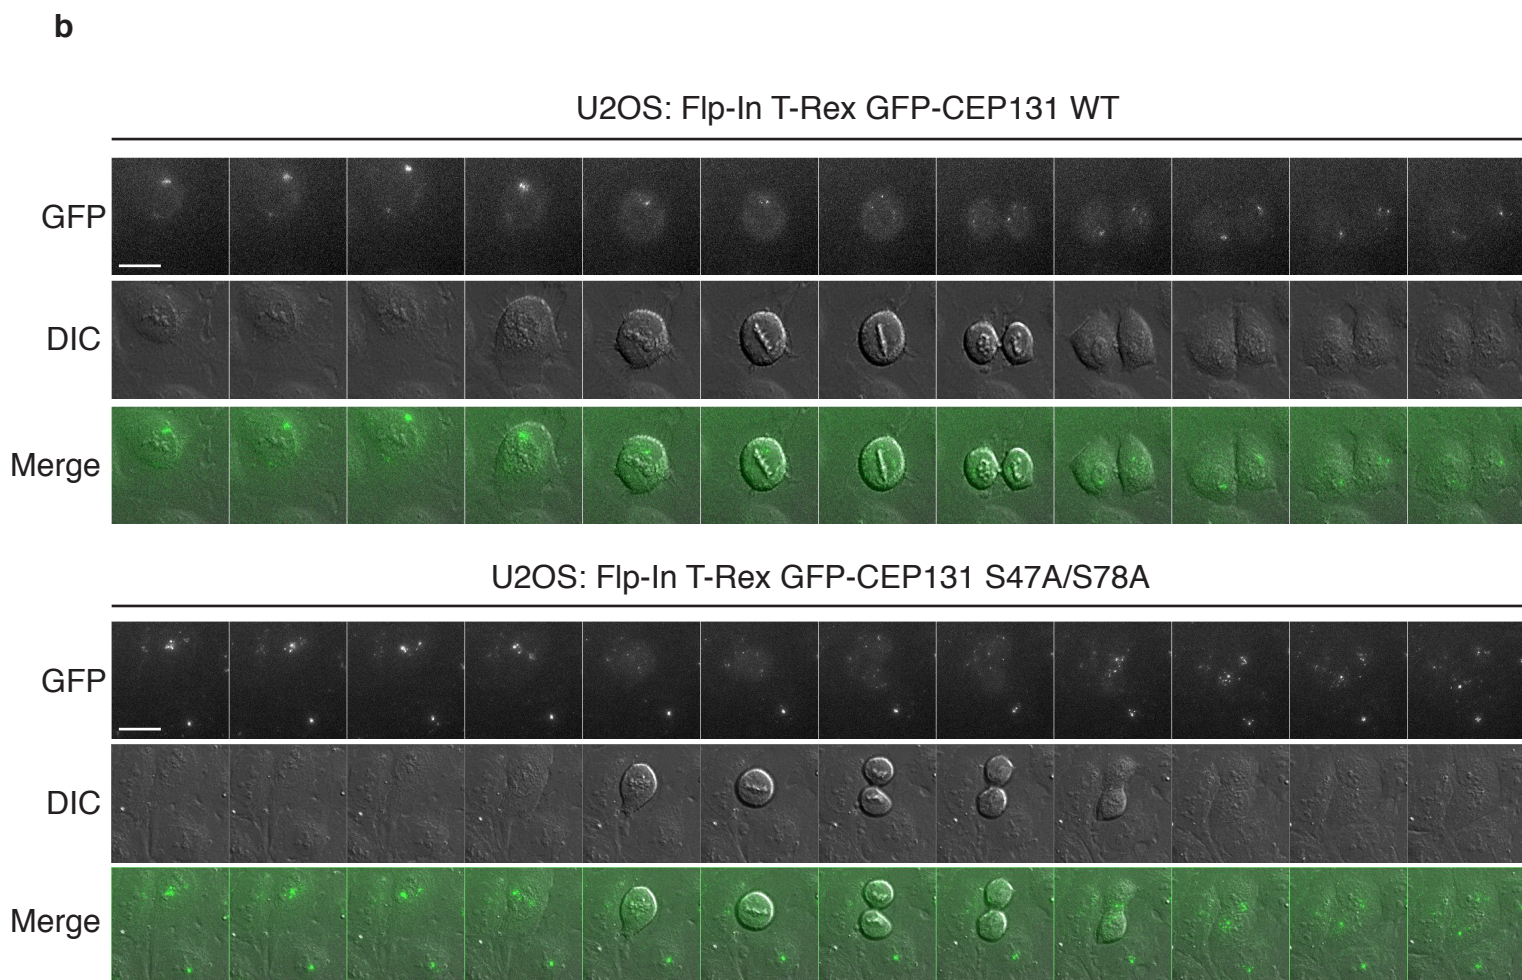

## Supplementary Figure 7

### Dynamic behavior of centriolar satellites in U2OS: Flp-In T-Rex GFP-CEP131 cell lines.

- a.** U2OS:FlpIn/T-Rex GFP-CEP131 WT and mutant (S47A/S78A) cells were transfected with control (CTRL) or siRNAs targeting PCM1 for 72 hours. Subsequently, cells were fixed and co-immunostained with antibodies against PCM1 and  $\gamma$ -tubulin. Inserts show an enlarged region around the centrosomes (marked by  $\gamma$ -tubulin) to distinguish between CS and centrosomal localization of GFP-CEP131. Efficient PCM1 knockdown was confirmed by immunoblotting lysates with antibodies against PCM1 and GFP.
- b.** U2OS:Flp-In T-Rex GFP-CEP131 WT and mutant (S47A/S78A) cells were seeded in live cell imaging dishes and imaged every 10 minutes over a period of 16 hours to record GFP-CEP131 localization during mitosis. Selected images demonstrate representative cells over a period from approximately 60 minutes before anaphase until 60 minutes after (10 minutes between frames). All scale bars, 10  $\mu$ m.

Tollenaere et. al. Supplementary Figure 8

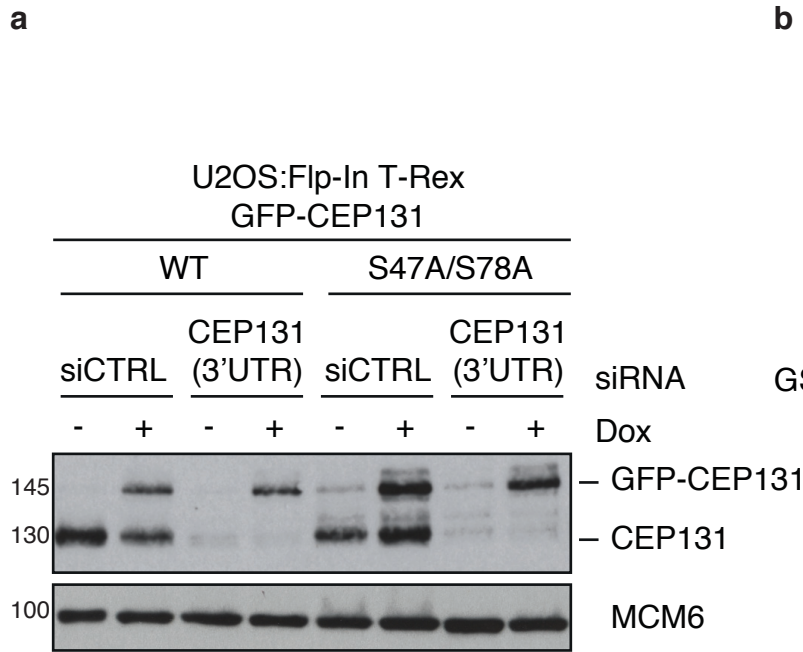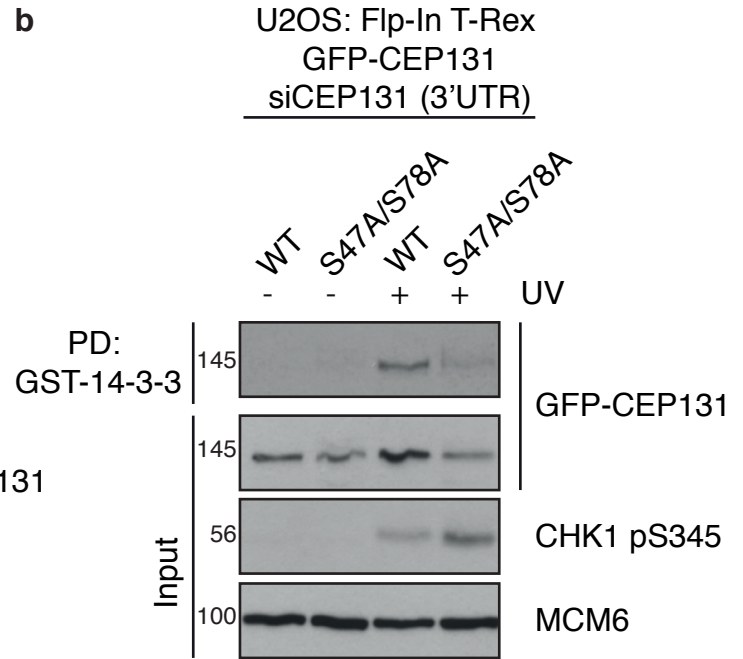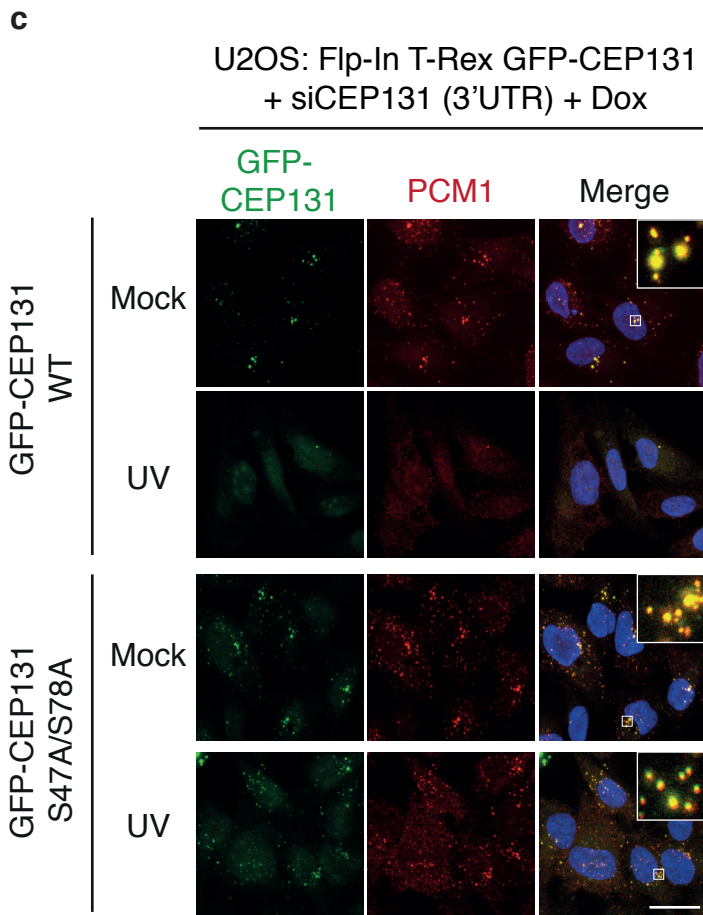

## Supplementary Figure 8

### CEP131 gene replacement highlights essential role for S47 and S78 in stress-induced CS remodeling.

- a. U2OS: Flp-In T-Rex GFP-CEP131 WT and mutant (S47A/S78A) cells were transfected with control (CTRL) or siRNA targeting a non-coding part of the CEP131 gene (siCEP131 3'UTR) and incubated in the presence of minute amounts of doxycycline ( $10 \text{ ng ml}^{-1}$ ) for 12 hrs. Lysates were analyzed by immunoblotting with the indicated antibodies.
- b. Cells were transfected with CEP131 3'UTR siRNA and induced with doxycycline as in (a). Cells were exposed to UV-irradiation, lysed after 1 h and incubated with GST-14-3-3. Input lysates and GST-bound material were analyzed by immunoblotting with the indicated antibodies.
- c. Cells from (b) were fixed one hour after UV-irradiation and immunostained with antibodies against PCM1. Scale bar, 10  $\mu\text{m}$ . Inserts show magnified regions of CS.



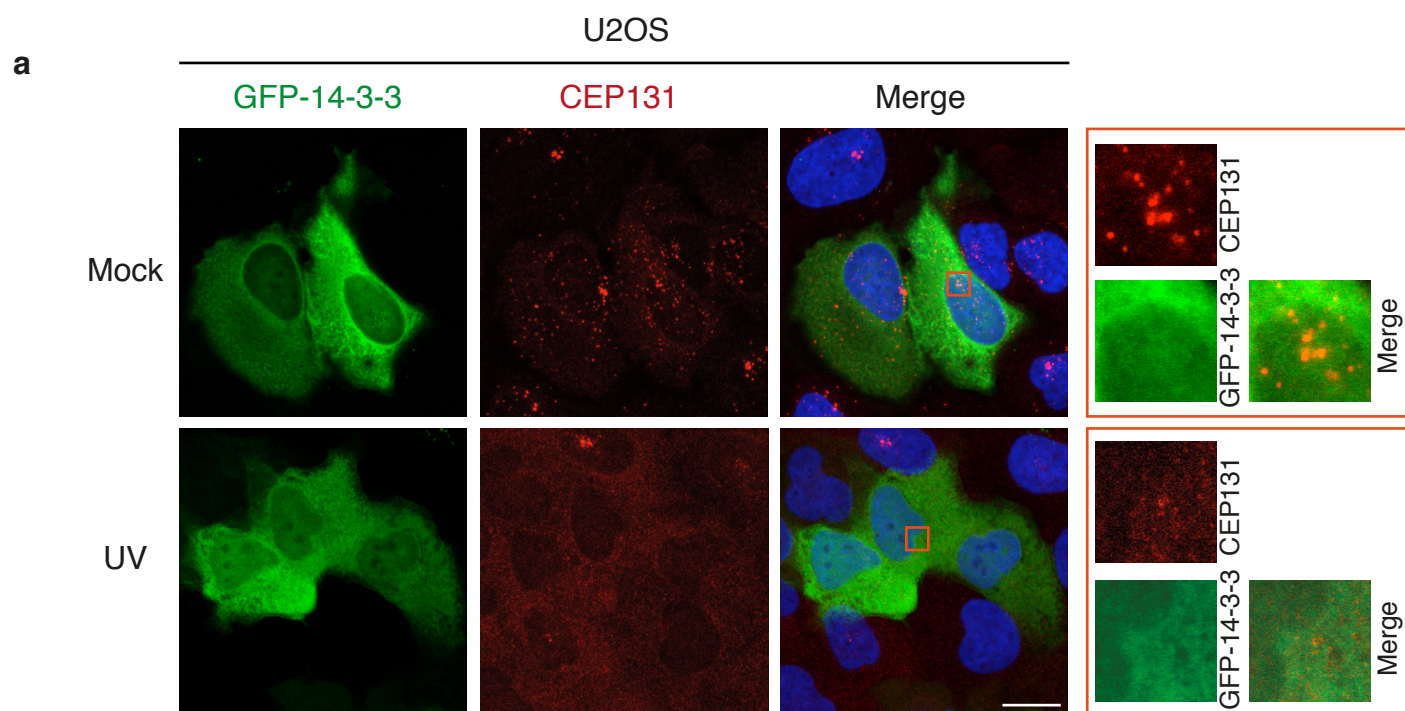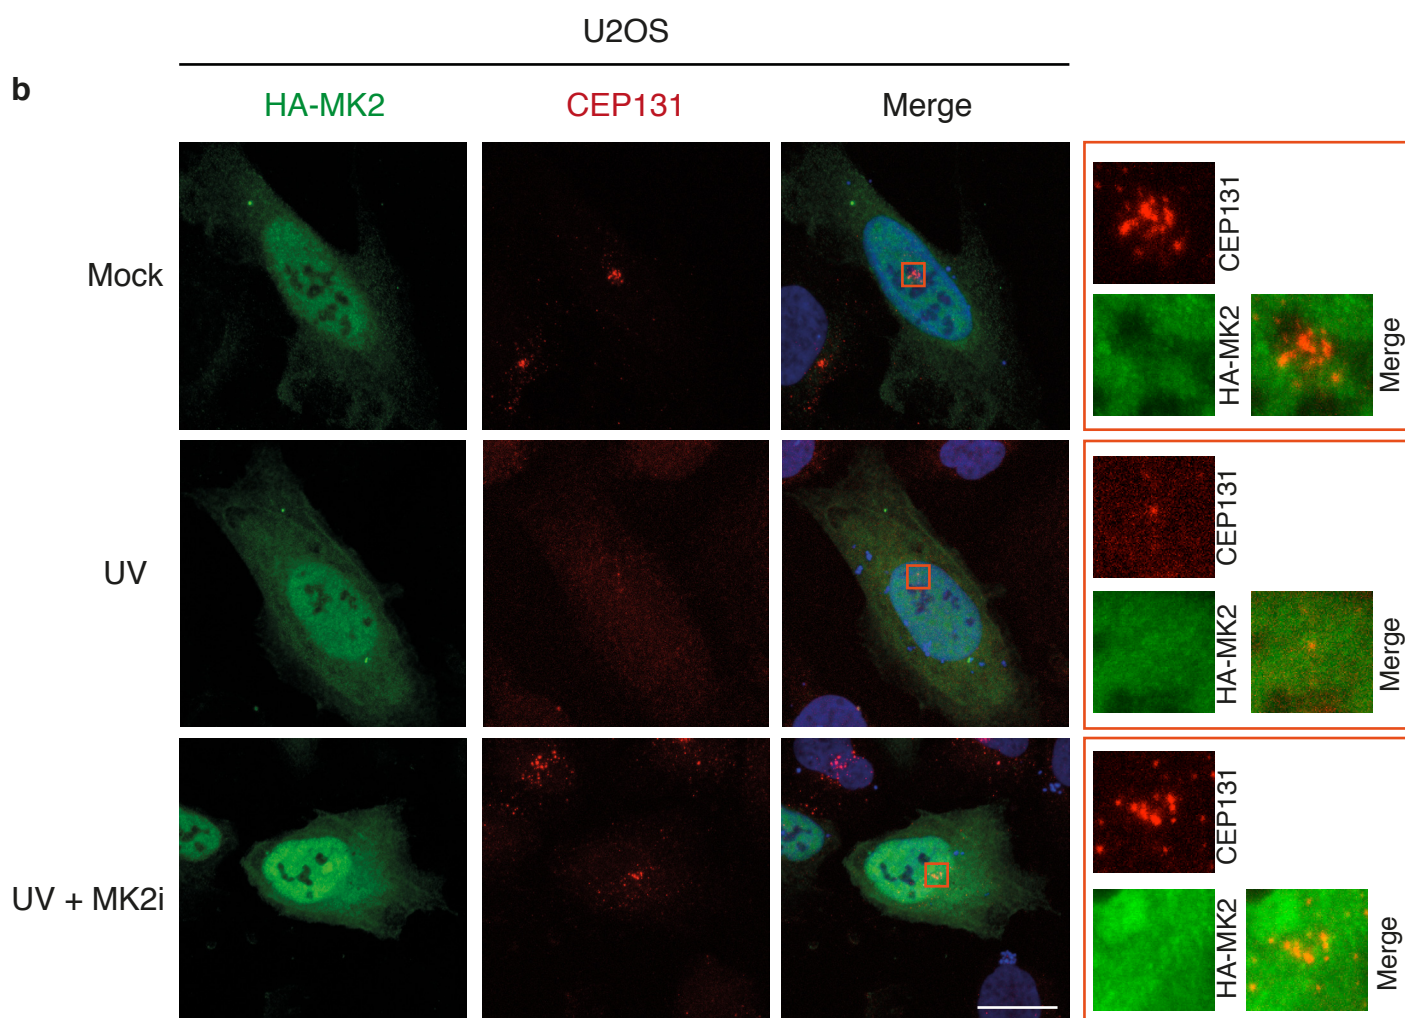

## Supplementary Figure 9

### **14-3-3 and MK2 do not physically associate with CS.**

- a. U2OS cells were transfected with GFP-tagged 14-3-3 and exposed to UV-irradiation as indicated. After 1 h, cells were fixed and stained with antibodies against CEP131.
- b. U2OS cells were transfected with HA-tagged MK2, pre-treated with MK2 inhibitor for 1 h, and exposed to UV-irradiation as indicated. After 1 h, cells were fixed and stained with antibodies against CEP131. Inserts show magnified regions of CS. Scale bars, 10  $\mu\text{m}$ .

U2OS

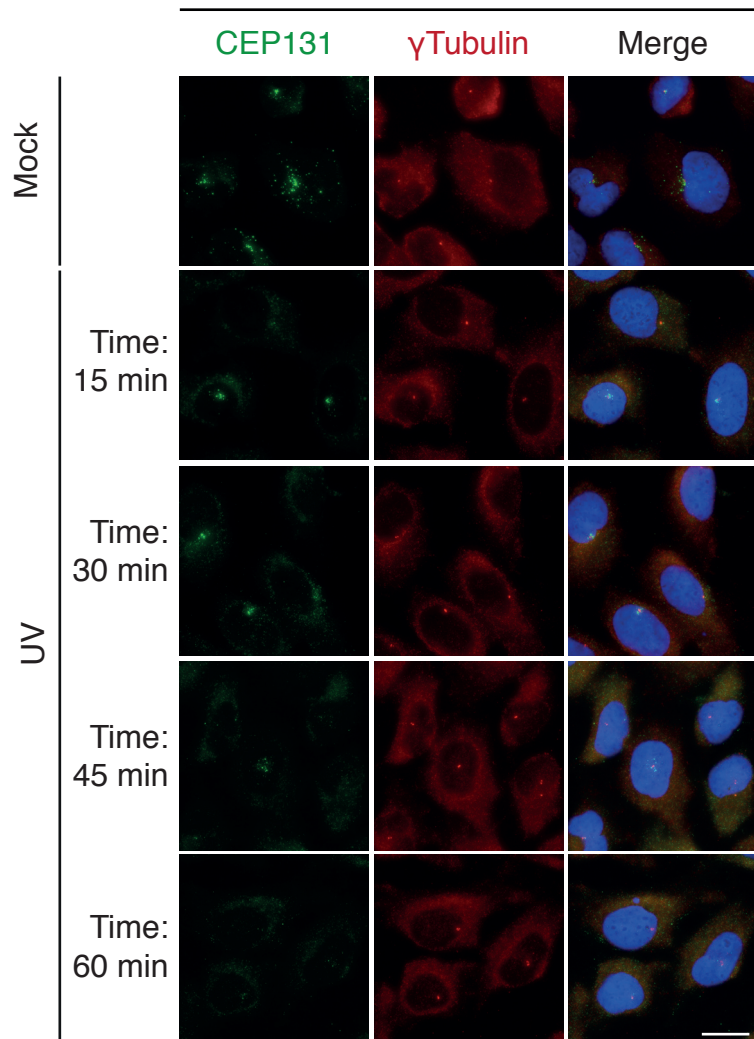

## **Supplementary Figure 10**

### **CS disperse gradually after UV-irradiation.**

- a.** U2OS cells were exposed to UV-irradiation, fixed at the indicated timepoints, and co-immunostained with CEP131 and  $\gamma$ -tubulin antibodies. Scale bar, 10  $\mu\text{m}$ .

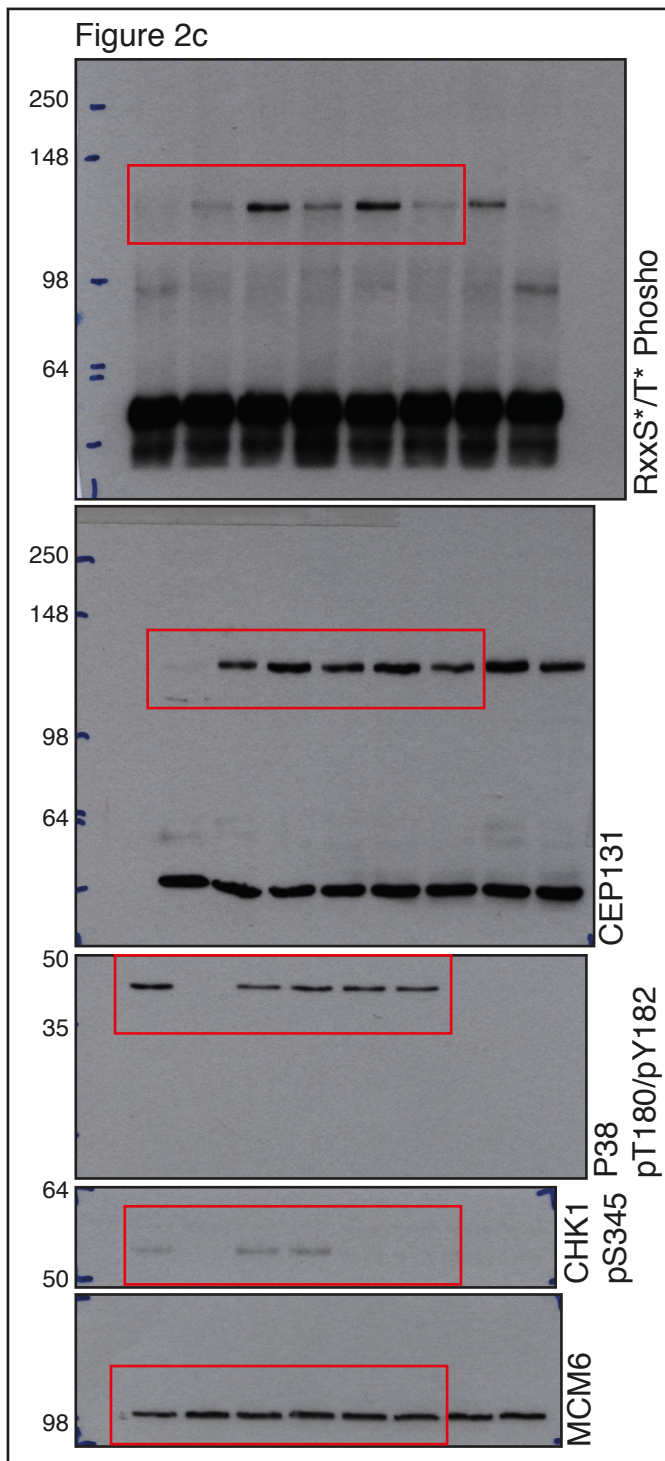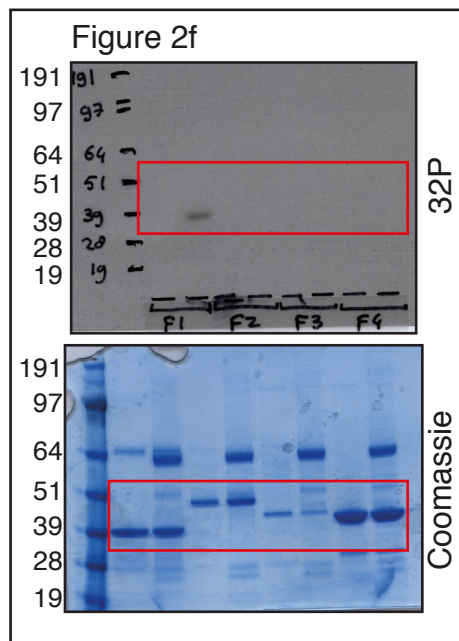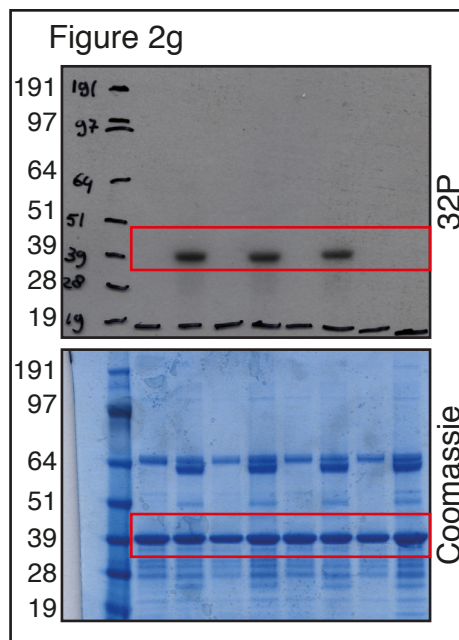

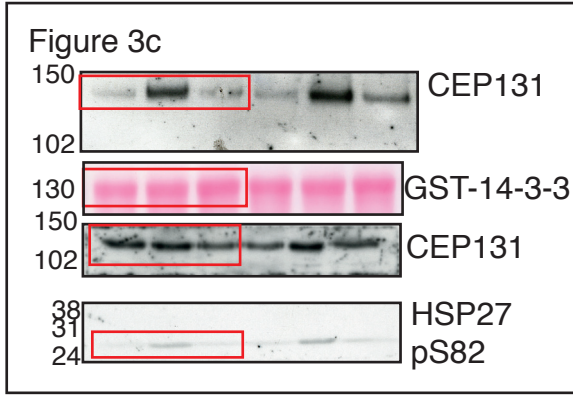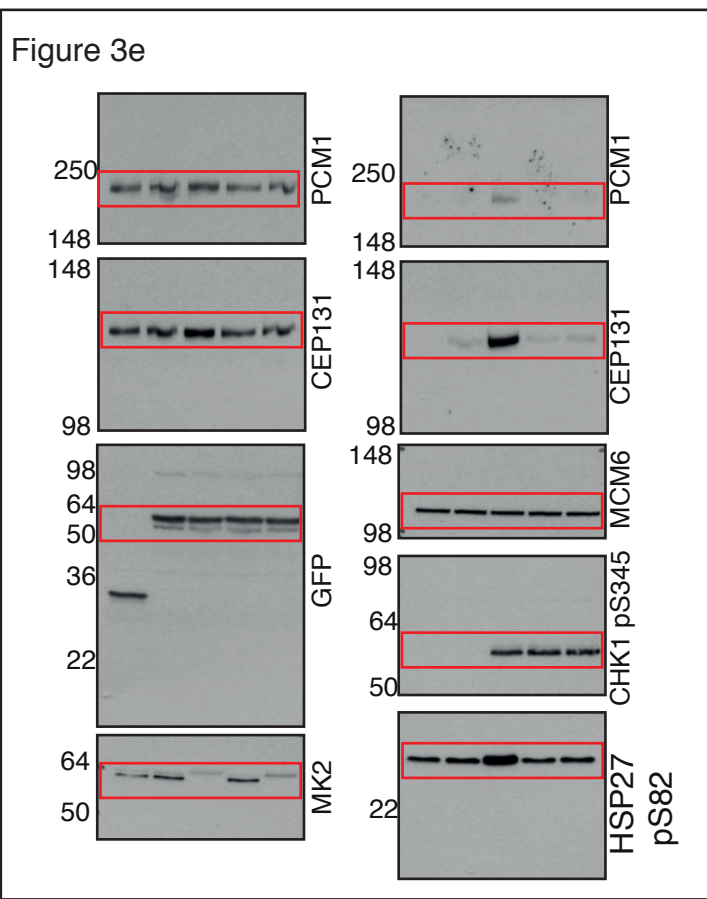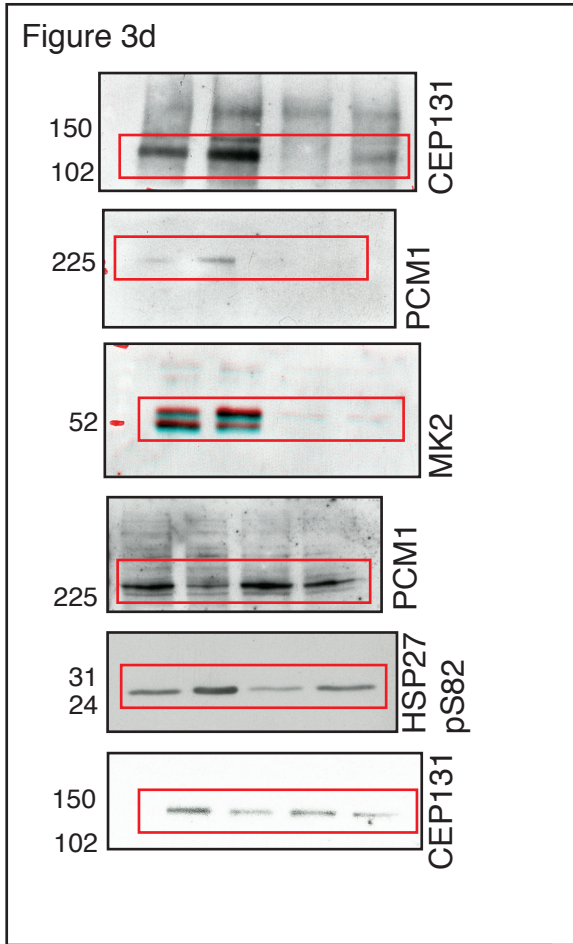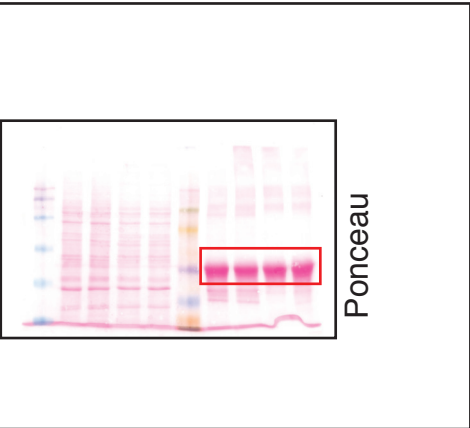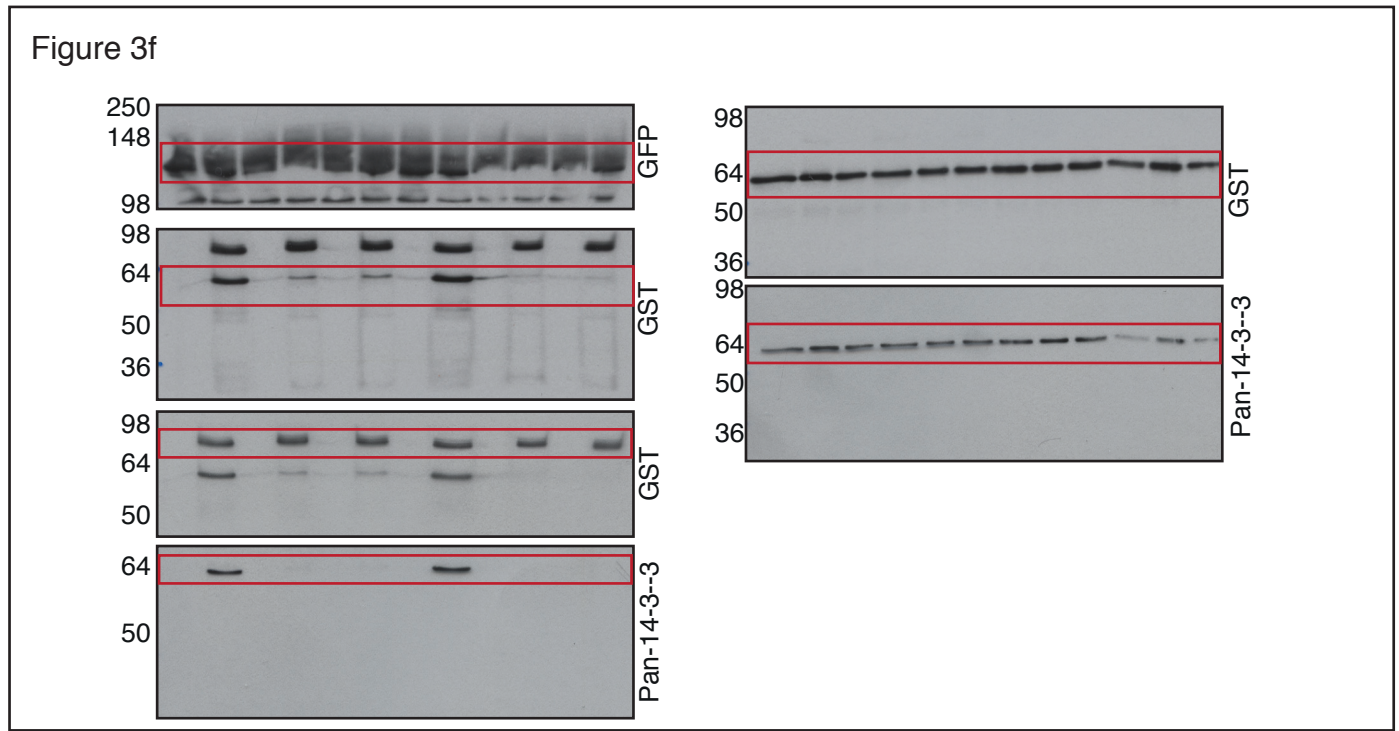

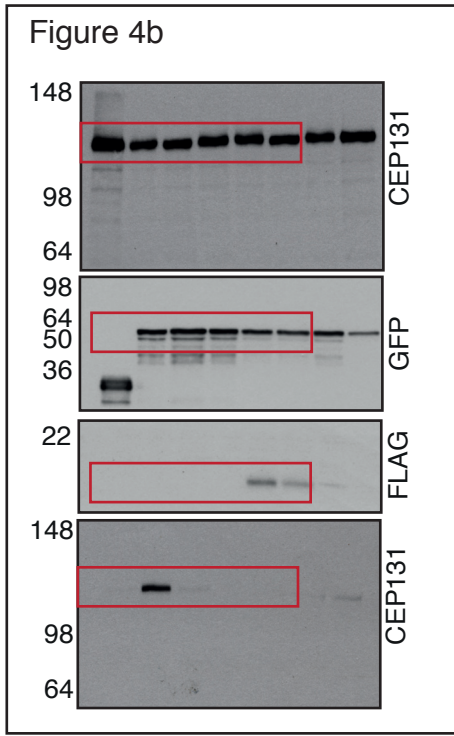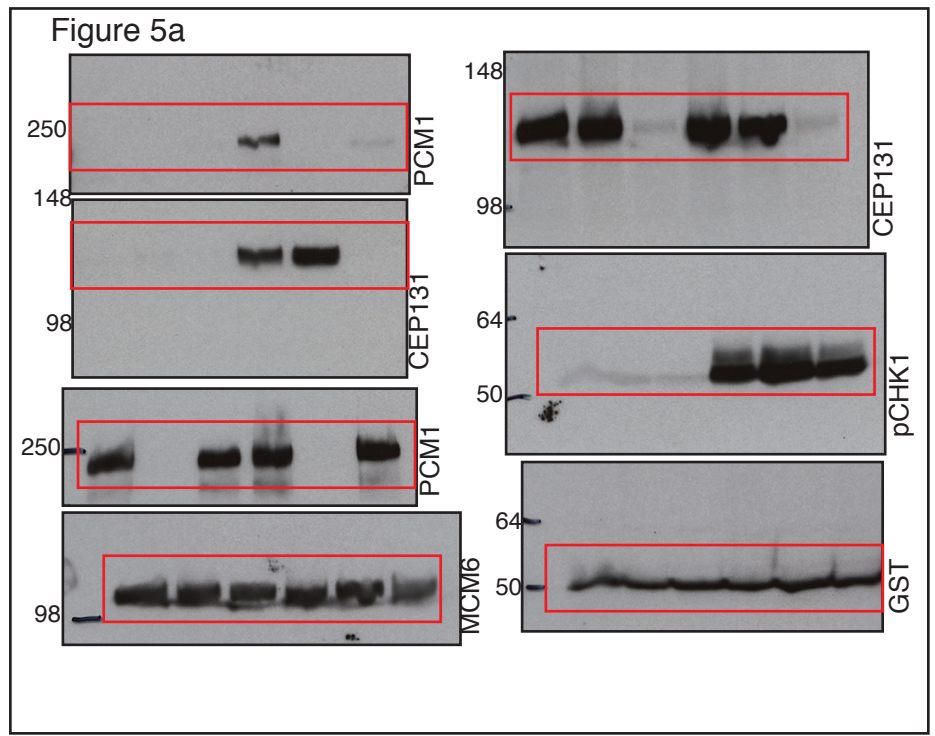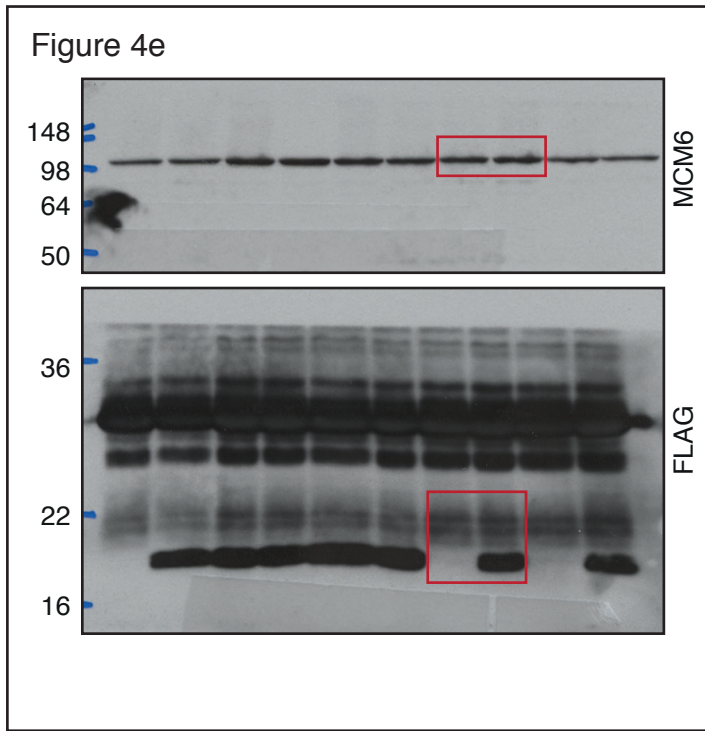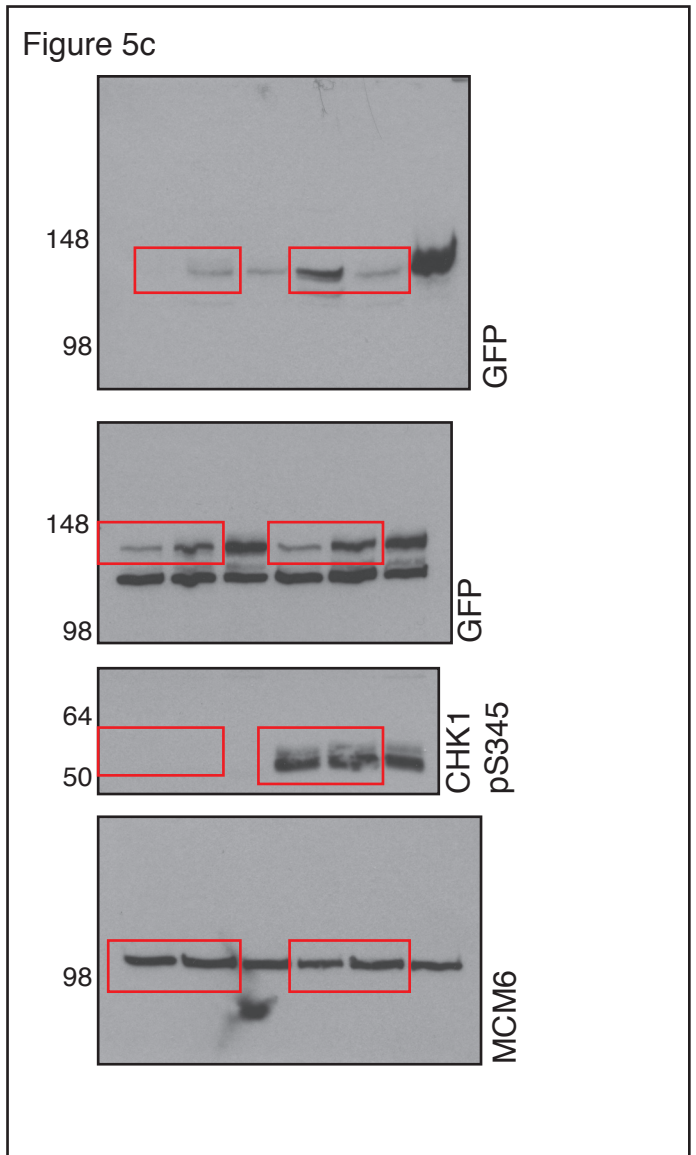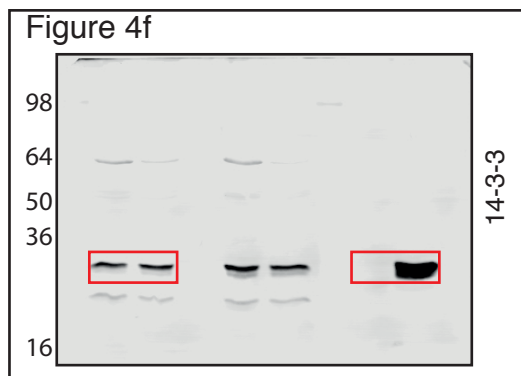

Figure 5b

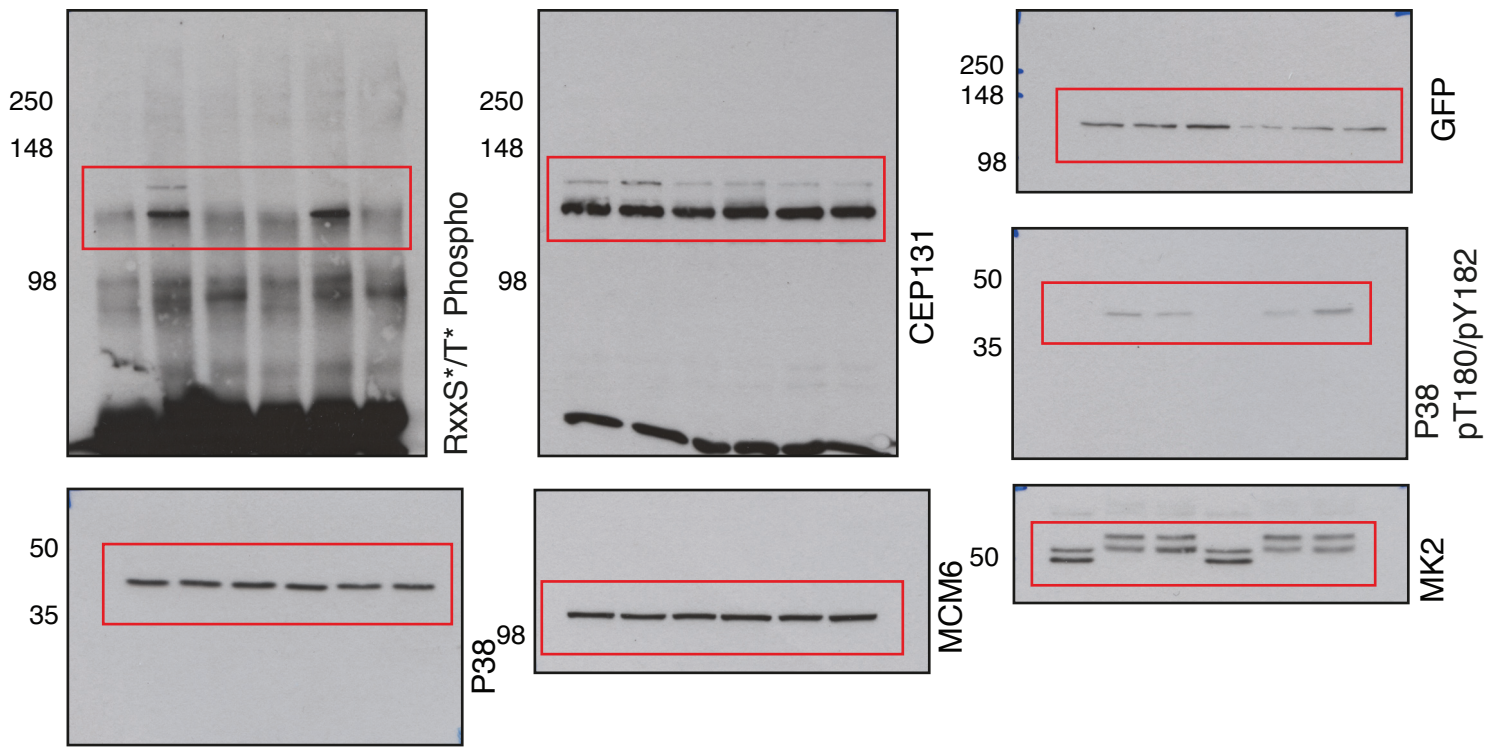

Figure 6a

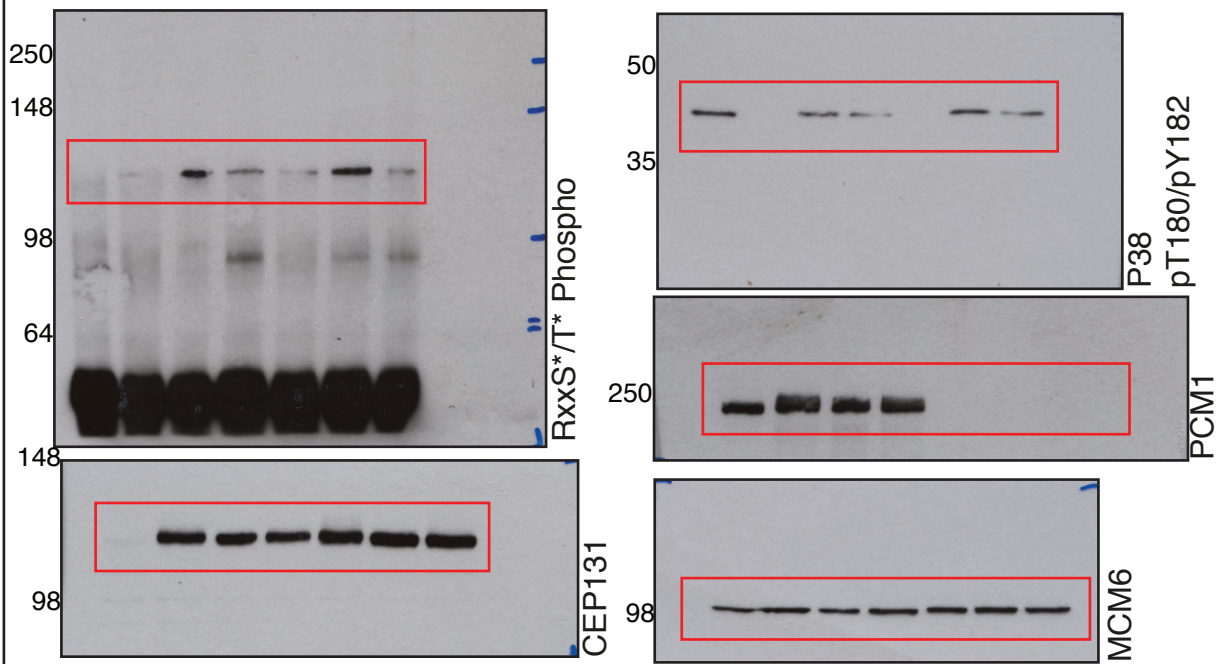

Figure 6c

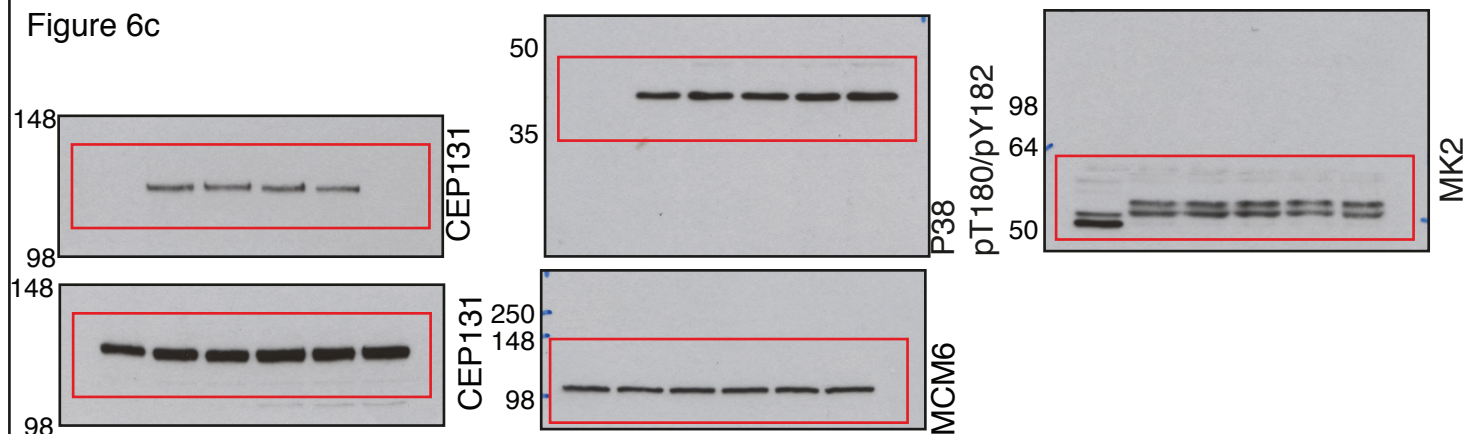



Supplementary Figure 1c

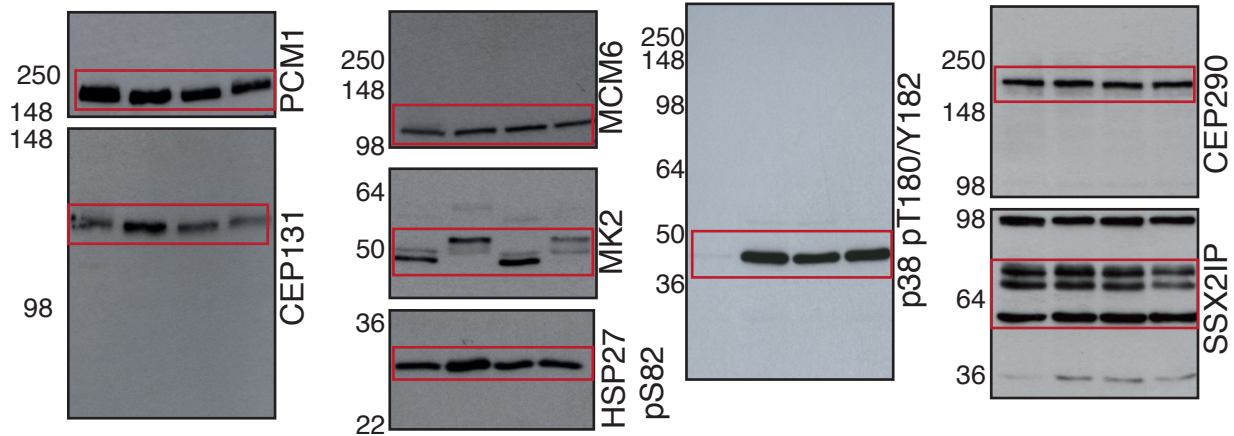

Supplementary Figure 3c

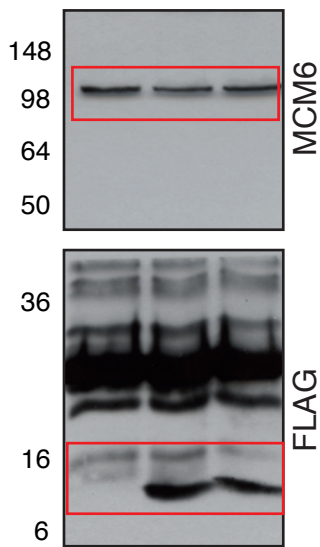

Supplementary Figure 4c

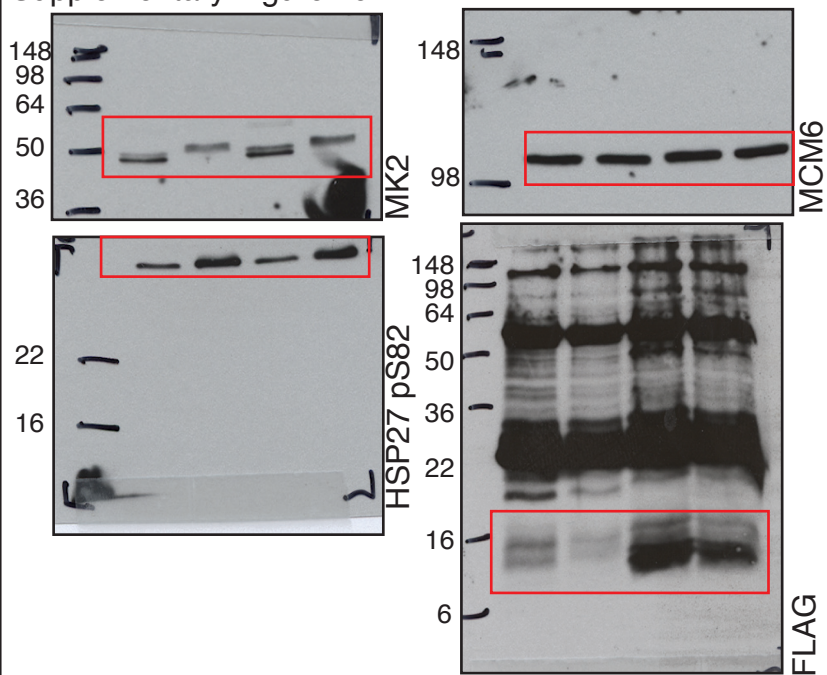

Supplementary Figure 5c

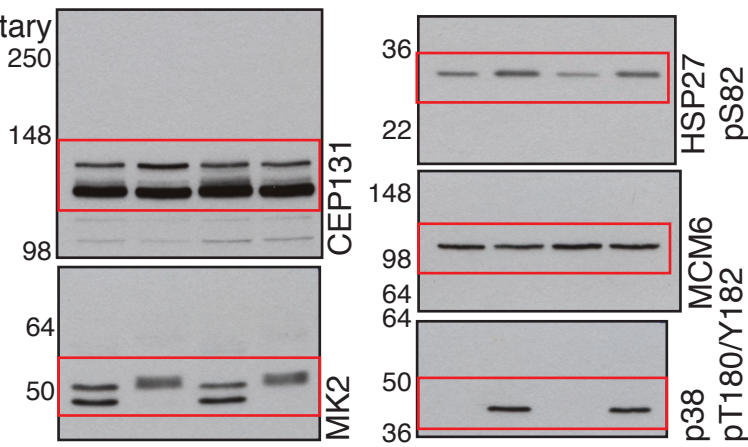

Supplementary Figure 6b

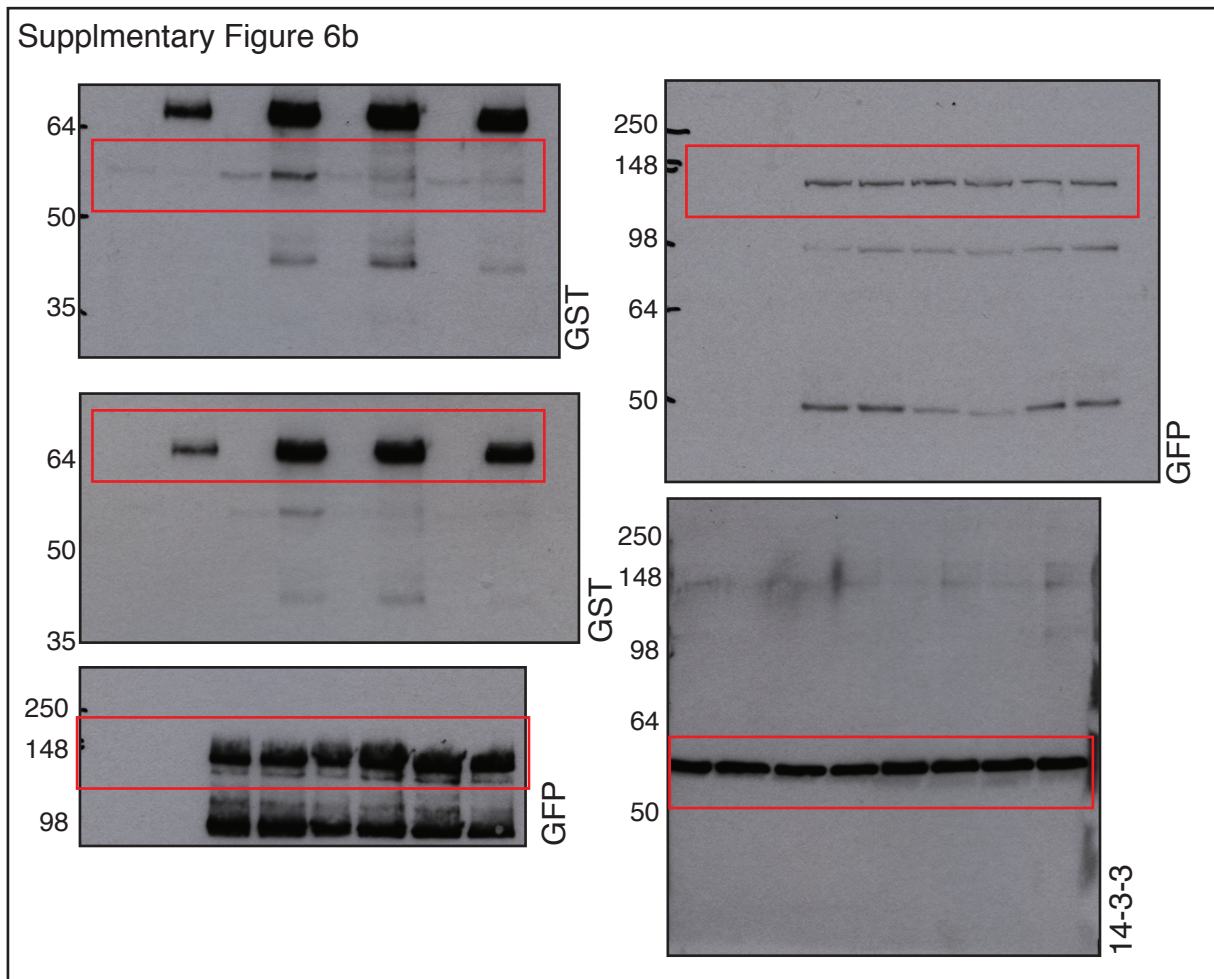

Supplementary Figure 7a

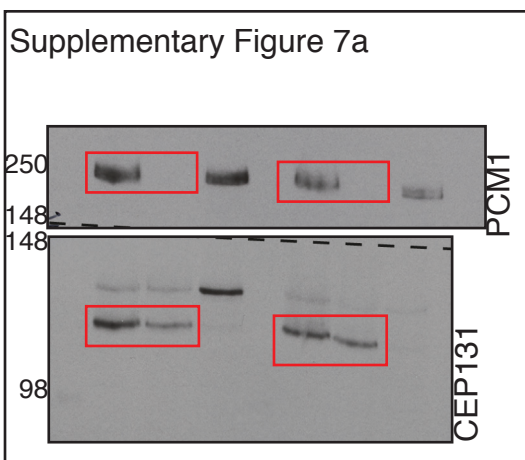

Supplementary Figure S8a

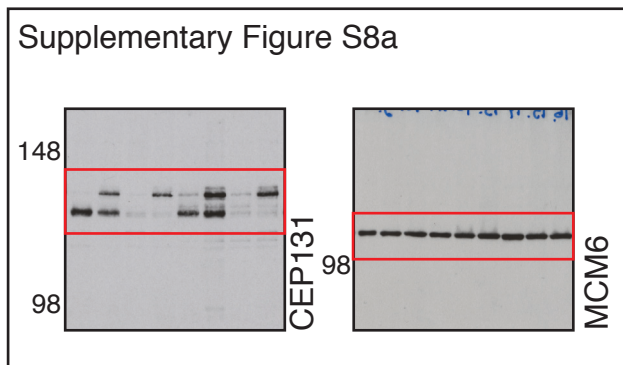

Supplementary Figure 8b

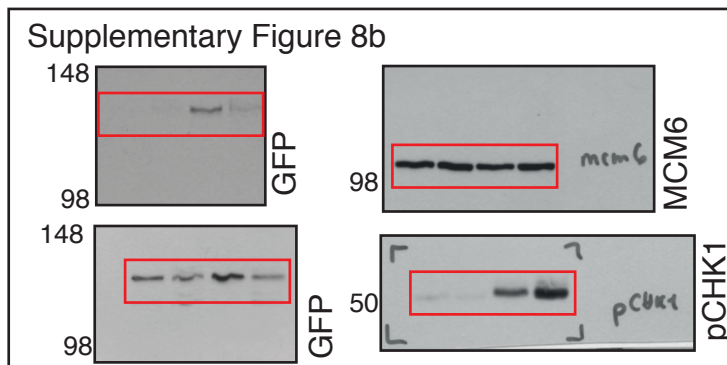

**Supplementary Figure 11**

**Full scans of cropped immunoblots.**
